# Supplementary material for: A mechanism in agrin signaling revealed by a prevalent Rapsyn mutation in congenital myasthenic syndrome
Source: eLife. 2019 Sep 24;8:e49180. doi: 10.7554/eLife.49180 (PMC6779466; doi:10.7554/eLife.49180)
Supplement: Figure 1—figure supplement 1—source data 1. [file elife-49180-fig1-figsupp1-data1.xlsx]

## Sheet: Sheet1
Figure 1-figure supplement 1-source data 1
Raw data, sample size (n), mean, SEM, p value, statistical methods and results are presented for the data in Figure 1-figure supplement 1C, 1E, 1H
1C
Rapsn mRNA	n	mean	SEM				WT	N88K
WT	3	1	0			Trial 1	1	1.45
N88K	3	1.153	0.1972			Trial 2	1	0.78
						Trial 3	1	1.23
Rapsn mRNA	P-value (Unpaired t-test)	summary
WT vs. N88K	0.4802	ns
1E
Ubiquitinated Rapsn	n	mean	SEM				WT	N88K
WT	3	1	0			Trial 1	1	0.85
N88K	3	0.9	0.115326			Trial 2	1	1.12
						Trial 3	1	0.73
Ubiquitinated Rapsn	P-value (Unpaired t-test)	summary
WT vs. N88K	0.4348	ns
1H
Number of axon branches-Secondary	n	mean	SEM
WT	6	18.5	1.544
N88K	6	24.67	1.116
N88K/-	6	31.5	1.057
–/–	6	41.83	1.621
Number of axon branches-Secondary	P-value (One-way ANOVA)	summary
WT vs. N88K	0.0089	**
WT vs. N88K/-	<0.001	***
WT vs. -/-	<0.001	***
N88K, N88K/- vs. -/-	<0.001	***
Number of axon branches-Tertiary	n	mean	SEM
WT	6	11.67	1.476
N88K	6	18.83	1.249
N88K/-	6	23.5	0.8851
–/–	6	30.33	1.453
Number of axon branches-Tertiary	P-value (One-way ANOVA)	summary
WT vs. N88K	0.0041	**
WT vs. N88K/-	<0.001	***
WT vs. -/-	<0.001	***
N88K, N88K/- vs. -/-	<0.001	***
Number of axon branches-Quaternary	n	mean	SEM
WT	6	3	0.5164
N88K	6	8.833	1.014
N88K/-	6	11.17	0.8724
–/–	6	14.67	0.8433
Number of axon branches-Quaternary	P-value (One-way ANOVA)	summary
WT vs. N88K	<0.001	***
WT vs. N88K/-	<0.001	***
WT vs. -/-	<0.001	***
N88K, N88K/- vs. -/-	0.0015	**
