# Supplementary material for: A mechanism in agrin signaling revealed by a prevalent Rapsyn mutation in congenital myasthenic syndrome
Source: eLife. 2019 Sep 24;8:e49180. doi: 10.7554/eLife.49180 (PMC6779466; doi:10.7554/eLife.49180)
Supplement: Figure 1—source data 1. [file elife-49180-fig1-data1.xlsx]

## Sheet: Sheet1
Figure 1-source data 1
Sample size (n), mean, SEM, p value, statistical methods and results are presented for the data in Figure 1E-J
1E
AChR clusters/mm2	n	mean	SEM
WT	6	594.8	25.08
N88K	6	160.7	22.64
N88K/-	6	170.5	17.21
AChR clusters/mm2	P-value (One-way ANOVA)	summary
WT vs. N88K	<0.001	***
WT vs. N88K/-	<0.001	***
1F
AChR cluster size (μm2)	n	mean	SEM
WT	44	85.57	4.474
N88K	42	61.31	7.101
N88K/-	43	54.9	5.675
AChR cluster size (μm2)	P-value (One-way ANOVA)	summary
WT vs. N88K	0.0045	**
WT vs. N88K/-	<0.001	***
1G
Length of AChR cluster (μm)	n	mean	SEM
WT	50	16.77	0.3657
N88K	42	21.46	1.448
N88K/-	43	25.63	1.786
Length of AChR cluster (μm)	P-value (One-way ANOVA)	summary
WT vs. N88K	0.001	**
WT vs. N88K/-	<0.001	***
1H
Endplate band width (μm)	n	mean	SEM
WT	6	202.2	13.92
N88K	6	341.2	13.7
N88K/-	6	318.5	15
Endplate band width (μm)	P-value (One-way ANOVA)	summary
WT vs. N88K	<0.001	***
WT vs. N88K/-	<0.001	***
1I
Relative AChR intensity	n	mean	SEM
WT	20	1	0.09496
N88K	20	0.1796	0.02045
N88K/-	20	0.1765	0.01747
Relative AChR intensity	P-value (One-way ANOVA)	summary
WT vs. N88K	<0.001	***
WT vs. N88K/-	<0.001	***
1J
Secondary branch length	n	mean	SEM
WT	40	61.08	4.673
N88K	45	171.9	9.427
N88K/-	39	195.5	10.4
–/–	34	252.2	9.92
Secondary branch length	P-value (One-way ANOVA)	summary
WT vs. N88K	<0.001	***
WT vs. N88K/-	<0.001	***
WT vs. -/-	<0.001	***
