# Supplementary material for: A mechanism in agrin signaling revealed by a prevalent Rapsyn mutation in congenital myasthenic syndrome
Source: eLife. 2019 Sep 24;8:e49180. doi: 10.7554/eLife.49180 (PMC6779466; doi:10.7554/eLife.49180)
Supplement: Figure 2—source data 1. [file elife-49180-fig2-data1.xlsx]

## Sheet: Sheet1
Figure 2-source data 1
Sample size (n), mean, SEM, p value, statistical methods and results are presented for the data in Figure 2E, 2F, 2G, 2H, 2M, 2N
2E
Junctional fold length (nm)	n	mean	SEM
WT	12	212.8	19.57
N88K	12	79.08	4.003
Junctional fold length (nm)	P-value (Unpaired t-test)	summary
WT vs. N88K	<0.001	***
2F
Synaptic vesicle density / μm2	n	mean	SEM
WT	13	66.77	3.242
N88K	13	40.31	3.189
Synaptic vesicle density / μm2	P-value (Unpaired t-test)	summary
WT vs. N88K	<0.001	***
2G
Vesicle diameter (nm)	n	mean	SEM
WT	130	43.65	19.57
N88K	139	44.8	1.008
Vesicle diameter (nm)	P-value (Unpaired t-test)	summary
WT vs. N88K	0.3784	ns
2H
Synaptic cleft width (nm)	n	mean	SEM
WT	14	62.29	0.7734
N88K	14	62.86	0.907
Synaptic cleft width (nm)	P-value (Unpaired t-test)	summary
WT vs. N88K	0.6357	ns
2M
Endplate band width (μm)	n	mean	SEM
WT	9	134.6	13.75
N88K	9	0	0
Endplate band width (μm)	P-value (Unpaired t-test)	summary
WT vs. N88K	<0.001	***
2N
AChR clusters / 0.01 mm2	n	mean	SEM
WT	7	58.61	5.189
N88K	7	0	0
AChR clusters / 0.01 mm2	P-value (Unpaired t-test)	summary
WT vs. N88K	<0.001	***
