# Supplementary material for: A mechanism in agrin signaling revealed by a prevalent Rapsyn mutation in congenital myasthenic syndrome
Source: eLife. 2019 Sep 24;8:e49180. doi: 10.7554/eLife.49180 (PMC6779466; doi:10.7554/eLife.49180)
Supplement: Figure 3—source data 1. [file elife-49180-fig3-data1.xlsx]

## Sheet: Sheet1
Figure 3-source data 1
Sample size (n), mean, SEM, p value, statistical methods and results are presented for the data in Figure 3A, 3B, 3D, and 3E
3A
Resting membrane potential (mV)	n	mean	SEM
WT	22	-69.2	0.619
N88K/+	22	-69.1	0.575
N88K	22	-69.5	0.63
N88K/-	22	-68.36	0.672
Resting membrane potential (mV)	P-value (Unpaired t-test)	summary
WT vs. N88K/+	0.957	ns
WT vs. N88K	0.7206	ns
WT vs. N88K/-	0.376	ns
3B
Fibers with mEPP	%
WT	88 (44/50)
N88K/+	90 (45/50)
N88K	12.5 (15/120)
N88K/-	10 (12/120)
3D
mEPP amplitude (mV)	n	mean	SEM
WT	42	2.06	0.1325
N88K/+	42	2.04	0.0636
N88K	42	0.306	0.02382
N88K/-	42	0.2582	0.01556
mEPP amplitude (mV)	P-value (Unpaired t-test)	summary
WT vs. N88K/+	0.8948	ns
WT vs. N88K	<0.001	***
WT vs. N88K/-	<0.001	***
3E
mEPP frequency (Hz)	n	mean	SEM
WT	11	0.05758	0.004695
N88K/+	11	0.05303	0.004391
N88K	11	0.03939	0.003388
N88K/-	11	0.03273	0.00314
mEPP frequency (Hz)	P-value (Unpaired t-test)	summary
N88K/+	0.4877	ns
WT vs. N88K	0.0051	**
WT vs. N88K/-	0.0003	***
