# Supplementary material for: A mechanism in agrin signaling revealed by a prevalent Rapsyn mutation in congenital myasthenic syndrome
Source: eLife. 2019 Sep 24;8:e49180. doi: 10.7554/eLife.49180 (PMC6779466; doi:10.7554/eLife.49180)
Supplement: Figure 4—figure supplement 1—source data 1. [file elife-49180-fig4-figsupp1-data1.xlsx]

## Sheet: Sheet1
Figure 4-figure supplement 1
Raw data, sample size (n), mean, SEM, p value, statistical methods and results are presented for the data in Figure 4-figure supplement 1B
Figure 4-figure supplement 1 - source data 1
Raw data, sample size (n), mean, SEM, p value, statistical methods and results are presented for the data in Figure 4-figure supplement 1B
Figure 4-figure supplement 1B
Rapsn protein	n	mean	SEM
WT CHX 0 hr	3	1	0
N88K CHX 0 hr	3	1	0
WT CHX 1 hr	3	0.951333	0.0287595
N88K CHX 1 hr	3	0.931667	0.0415144
WT CHX 2 hr	3	0.908	0.0193993
N88K CHX 2 hr	3	0.857333	0.0349014
WT CHX 4 hr	3	0.713333	0.0328244
N88K CHX 4 hr	3	0.712333	0.0098714
WT CHX 6 hr	3	0.592667	0.0439103
N88K CHX 6 hr	3	0.599333	0.0266604
WT CHX 8 hr	3	0.498	0.00458258
N88K CHX 8 hr	3	0.577433	0.0432488
Rapsn protein	P-value (Unpaired t-test)	summary
WT CHX 0 hr vs. N88K CHX 0 hr
WT CHX 1 hr vs. N88K CHX 1 hr	0.716812	ns
WT CHX 2 hr vs. N88K CHX 2 hr	0.273299	ns
WT CHX 4 hr vs. N88K CHX 4 hr	0.978123	ns
WT CHX 6 hr vs. N88K CHX 6 hr	0.903007	ns
WT CHX 8 hr vs. N88K CHX 8 hr	0.141813	ns
	WT CHX 0 hr	N88K CHX 0 hr	WT CHX 1 hr	N88K CHX 1 hr	WT CHX 2 hr	N88K CHX 2 hr	WT CHX 4 hr	N88K CHX 4 hr	WT CHX 6 hr	N88K CHX 6 hr	WT CHX 8 hr	N88K CHX 8 hr
Trial 1	1	1	0.984	0.994	0.905	0.845	0.775	0.704	0.641	0.643	0.504	0.654
Trial 2	1	1	0.894	0.853	0.943	0.804	0.702	0.732	0.505	0.551	0.489	0.5043
Trial 3	1	1	0.976	0.948	0.876	0.923	0.663	0.701	0.632	0.604	0.501	0.574
