# Supplementary material for: A mechanism in agrin signaling revealed by a prevalent Rapsyn mutation in congenital myasthenic syndrome
Source: eLife. 2019 Sep 24;8:e49180. doi: 10.7554/eLife.49180 (PMC6779466; doi:10.7554/eLife.49180)
Supplement: Figure 4—figure supplement 2—source data 1. [file elife-49180-fig4-figsupp2-data1.xlsx]

## Sheet: Sheet1
Figure 4-figure supplement 2 - source data 1
Raw data, sample size (n), mean, SEM, p value, statistical methods and results are presented for the data in Figure 4-figure supplement 2B, 2D
Figure 4-figure supplement 2B
Rapsn mRNA	n	mean	SEM			WT	N88K
WT	3	1	0		Trial 1	1	0.94
N88K	3	1.08	0.098		Trial 2	1	1.27
					Trial 3	1	1.03
Rapsn mRNA	P-value (Unpaired t-test)	summary
WT vs. N88K	0.4622	ns
Figure 4-figure supplement 2D
Rapsn protein	n	mean	SEM
WT CHX 0 hr	3	1	0
N88K CHX 0 hr	3	1	0
WT CHX 1 hr	3	0.936667	0.0533677
N88K CHX 1 hr	3	0.94	0.019975
WT CHX 2 hr	3	0.801	0.0392088
N88K CHX 2 hr	3	0.793	0.020108
WT CHX 4 hr	3	0.703333	0.0349301
N88K CHX 4 hr	3	0.712667	0.0203497
WT CHX 6 hr	3	0.629333	0.0175341
N88K CHX 6 hr	3	0.637667	0.0600009
WT CHX 8 hr	3	0.527333	0.0203333
N88K CHX 8 hr	3	0.476333	0.0182056
Rapsn protein	P-value (Unpaired t-test)	summary
WT CHX 0 hr vs. N88K CHX 0 hr
WT CHX 1 hr vs. N88K CHX 1 hr	0.716812	ns
WT CHX 2 hr vs. N88K CHX 2 hr	0.273299	ns
WT CHX 4 hr vs. N88K CHX 4 hr	0.978123	ns
WT CHX 6 hr vs. N88K CHX 6 hr	0.903007	ns
WT CHX 8 hr vs. N88K CHX 8 hr	0.141813	ns
	WT CHX 0 hr	N88K CHX 0 hr	WT CHX 1 hr	N88K CHX 1 hr	WT CHX 2 hr	N88K CHX 2 hr	WT CHX 4 hr	N88K CHX 4 hr	WT CHX 6 hr	N88K CHX 6 hr	WT CHX 8 hr	N88K CHX 8 hr
Trial 1	1	1	1.041	0.973	0.847	0.804	0.764	0.743	0.604	0.605	0.552	0.504
Trial 2	1	1	0.904	0.904	0.723	0.821	0.703	0.674	0.663	0.554	0.487	0.483
Trial 3	1	1	0.865	0.943	0.833	0.754	0.643	0.721	0.621	0.754	0.543	0.442
