# Supplementary material for: A mechanism in agrin signaling revealed by a prevalent Rapsyn mutation in congenital myasthenic syndrome
Source: eLife. 2019 Sep 24;8:e49180. doi: 10.7554/eLife.49180 (PMC6779466; doi:10.7554/eLife.49180)
Supplement: Figure 4—source data 1. [file elife-49180-fig4-data1.xlsx]

## Sheet: Sheet1
Figure 4-source data 1
Sample size (n), mean, SEM, p value, statistical methods and results are presented for the data in Figure 4B, 4F
4B
Overlapped clusters	n	mean	SEM
EGFP	20	0	0
Rapsn-EGFP	20	44.6	2.834
N88K-EGFP	20	8.05	0.8929
Overlapped clusters	P-value (Unpaired t-test)	summary
Rapsn-EGFP vs. N88K-EGFP	<0.001	***
4F
AChR clusters/mm	n	mean	SEM
WT - Agrin	20	6.5	0.5155
WT + Agrin	20	30.05	2.045
N88K - Agrin	20	0.7	0.2524
N88K + Agrin	20	4.85	0.4881
AChR clusters/mm	P-value (Two-way ANOVA)	summary
WT - Agrin vs. WT + Agrin	<0.001	***
N88K - Agrin vs. N88K + Agrin	<0.001	***
WT + Agrin vs. N88K + Agrin	<0.001	***
