# Supplementary material for: A mechanism in agrin signaling revealed by a prevalent Rapsyn mutation in congenital myasthenic syndrome
Source: eLife. 2019 Sep 24;8:e49180. doi: 10.7554/eLife.49180 (PMC6779466; doi:10.7554/eLife.49180)
Supplement: Figure 5—figure supplement 1—source data 1. [file elife-49180-fig5-figsupp1-data1.xlsx]

## Sheet: Sheet1
Figure 5-figure supplement 1 - source data 1
Raw data, sample size (n), mean, SEM, p value, statistical methods and results are presented for the data in Figure 5-figure supplement 1D
1D
Rapsn protien (%)	n	mean	SEM				WT 0.05% triton	WT 1% triton	N88K 0.05% triton	N88K 1% triton
WT 0.05% triton	3	0.25	0.0346			Trial 1	0.25	0.75	0.31	0.69
WT 1% triton	3	0.75	0.0346			Trial 2	0.31	0.69	0.17	0.83
N88K 0.05% triton	3	0.27	0.0503			Trial 3	0.19	0.81	0.33	0.67
N88K 1% triton	3	0.73	0.0503
Rapsn protien (%)	P-value (Unpaired t-test)	summary
WT 0.05% triton vs N88K 0.05% triton	0.7598	ns
WT 1% triton vs N88K 1% triton	0.7598	ns
