# Supplementary material for: A mechanism in agrin signaling revealed by a prevalent Rapsyn mutation in congenital myasthenic syndrome
Source: eLife. 2019 Sep 24;8:e49180. doi: 10.7554/eLife.49180 (PMC6779466; doi:10.7554/eLife.49180)
Supplement: Figure 5—source data 1. [file elife-49180-fig5-data1.xlsx]

## Sheet: Sheet1
Figure 5-source data 1
Raw data, sample size (n), mean, SEM, p value, statistical methods and results are presented for the data in Figure 5D, 5F, 5H
5D
Neddylated δ-AChR	n	mean	SEM			WT	C366A	N88K
WT	3	1	0		trial 1	1	0.13	0.14
C366A	3	0.1567	0.04807		trial 2	1	0.25	0.23
N88K	3	0.1967	0.02848		trial 3	1	0.09	0.22
Neddylated δ-AChR	P-value (One-Way ANOVA)	summary
WT vs. C366A	<0.001	***
WT vs. N88K	<0.001	***
5F
Neddylated δ-AChR	n	mean	SEM			WT	N88K
WT	3	1	0		trial 1	1	0.26
N88K	3	0.2667	0.05207		trial 2	1	0.18
					trial 3	1	0.36
Neddylated δ-AChR	P-value (Unpaired t- test)	summary
WT vs. N88K	<0.001	***
5H
Neddylated δ-AChR	n	mean	SEM			WT	N88K
WT	3	1	0		trial 1	1	0.43
N88K	3	0.2633	0.08511		trial 2	1	0.21
					trial 3	1	0.15
Neddylated δ-AChR	P-value (Unpaired t- test)	summary
WT vs. N88K	<0.001	***
