# Supplementary material for: A mechanism in agrin signaling revealed by a prevalent Rapsyn mutation in congenital myasthenic syndrome
Source: eLife. 2019 Sep 24;8:e49180. doi: 10.7554/eLife.49180 (PMC6779466; doi:10.7554/eLife.49180)
Supplement: Figure 6—source data 1. [file elife-49180-fig6-data1.xlsx]

## Sheet: Sheet1
Figure 6-source data 1
Raw data, sample size (n), mean, SEM, p value, statistical methods and results are presented for the data in Figure 6D, 6G, 6I
6D
Rapsn P-Tyr	n	mean	SEM			WT	N88K
WT	3	1	0		trial 1	1	0.74
N88K	3	0.5167	0.1126		trial 2	1	0.38
					trial 3	1	0.43
Rapsn P-Tyr	P-value (Unpaired t- test)	summary
WT vs. N88K	0.0127	*
6G
Rapsn P-Tyr	n	mean	SEM				WT (E14)	N88K (E14)	WT (P0)	N88K (P0)
WT (E14)	3	1	0		trial 1		1	0.38	1	0.25
N88K (E14)	3	0.4067	0.01453		trial 2		1	0.41	1	0.38
WT (P0)	3	1	0		trial 3		1	0.43	1	0.53
N88K (P0)	3	0.3867	0.08089
Rapsn P-Tyr	P-value (Unpaired t- test)	summary
WT vs. N88K (E14)	< 0.001	***
WT vs. N88K (P0)	0.0016	**
6I
Rapsn P-Tyr	n	mean	SEM			WT	N88K	Y59F	Y86F	Y105F
WT	3	1	0		trial 1	1	0.58	1.26	0.74	1.57
N88K	3	0.45	0.09292		trial 2	1	0.27	1.47	0.25	0.89
Y59F	3	1.22	0.1572		trial 3	1	0.5	0.93	0.28	1.33
Y86F	3	0.4233	0.1586
Y105F	3	1.263	0.1991
Rapsn P-Tyr	P-value (Unpaired t-test)	summary
WT vs. N88K	0.0041	**
WT vs. Y59F	0.2341	ns
WT vs. Y86F	0.022	*
WT vs. Y105F	0.2565	ns
