# Supplementary material for: A mechanism in agrin signaling revealed by a prevalent Rapsyn mutation in congenital myasthenic syndrome
Source: eLife. 2019 Sep 24;8:e49180. doi: 10.7554/eLife.49180 (PMC6779466; doi:10.7554/eLife.49180)
Supplement: Figure 7—figure supplement 1—source data 1. [file elife-49180-fig7-figsupp1-data1.xlsx]

## Sheet: Sheet1
Figure 7-figure supplement 1- source data 1
Raw data, sample size (n), mean, SEM, p value, statistical methods and results are presented for the data in Figure 7-figure supplement 1C, 1E
1C
Rapsn mRNA	n	mean	SEM			WT	Y86F
WT	3	1	0		Trial 1	1	1.73
Y86F	3	1.383	0.2533		Trial 2	1	1.53
					Trial 3	1	0.89
Rapsn mRNA	P-value (Unpaired t-test)	summary
WT vs. Y86F	0.2048	ns
1E
Rapsn protein	n	mean	SEM
WT CHX 0 hr	3	1	0
Y86F CHX 0 hr	3	1	0
WT CHX 1 hr	3	1.01333	0.0876229
Y86F CHX 1 hr	3	1.042	0.150789
WT CHX 2 hr	3	0.8455	0.0567384
Y86F CHX 2 hr	3	0.9245	0.0207906
WT CHX 4 hr	3	0.654533	0.042118
Y86F CHX 4 hr	3	0.759667	0.04682
WT CHX 6 hr	3	0.638333	0.0560991
Y86F CHX 6 hr	3	0.627667	0.112394
WT CHX 8 hr	3	0.453333	0.0446331
Y86F CHX 8 hr	3	0.457667	0.109045
Rapsn protein	P-value (Unpaired t-test)	summary
WT CHX 0 hr vs. Y86F CHX 0 hr
WT CHX 1 hr vs. Y86F CHX 1 hr	0.877409	ns
WT CHX 2 hr vs. Y86F CHX 2 hr	0.261177	ns
WT CHX 4 hr vs. Y86F CHX 4 hr	0.17036	ns
WT CHX 6 hr vs. Y86F CHX 6 hr	0.93641	ns
WT CHX 8 hr vs. Y86F CHX 8 hr	0.972425	ns
	WT CHX 0 hr	Y86F CHX 0 hr	WT CHX 1 hr	Y86F CHX 1 hr	WT CHX 2 hr	Y86F CHX 2 hr	WT CHX 4 hr	Y86F CHX 4 hr	WT CHX 6 hr	Y86F CHX 6 hr	WT CHX 8 hr	Y86F CHX 8 hr
Trial 1	1	1	1.15	1.14	0.843	0.9475	0.6384	0.672	0.621	0.609	0.513	0.653
Trial 2	1	1	0.85	1.24	0.7485	0.943	0.7342	0.775	0.551	0.831	0.366	0.276
Trial 3	1	1	1.04	0.746	0.945	0.883	0.591	0.832	0.743	0.443	0.481	0.444
