# Supplementary material for: A mechanism in agrin signaling revealed by a prevalent Rapsyn mutation in congenital myasthenic syndrome
Source: eLife. 2019 Sep 24;8:e49180. doi: 10.7554/eLife.49180 (PMC6779466; doi:10.7554/eLife.49180)
Supplement: Figure 7—source data 1. [file elife-49180-fig7-data1.xlsx]

## Sheet: Sheet1
Figure 7-source data 1
Raw data, sample size (n), mean, SEM, p value, statistical methods and results are presented for the data in Figure 7B, 7D, 7F, 7H, 7J, 7L, 7N
7B
Neddylated δ-AChR	n	mean	SEM			WT	C366A	Y86F
WT	3	1	0		trial 1	1	0.25	0.09
C366A	3	0.1633	0.04485		trial 2	1	0.14	0.16
Y86F	3	0.1767	0.05548		trial 3	1	0.1	0.28
Neddylated δ-AChR	P-value (One-Way ANOVA)	summary
WT vs. C366A	< 0.001	***
WT vs. Y86F	< 0.001	***
7D
Rapsn p-Tyr	n	mean	SEM			WT	Y86F
WT	3	1	0		trial 1	1	0.54
Y86F	3	0.5167	0.1304		trial 2	1	0.73
					trial 3	1	0.28
Rapsn p-Tyr	P-value (Unpaired t- test)	summary
WT vs. Y86F	0.0207	*
7F
AChR clusters/mm	n	mean	SEM
WT - Agrin	20	4.2	0.5921
WT + Agrin	20	34.4	2.821
Y86F - Agrin	20	0.65	0.1666
Y86F + Agrin	20	2.2	0.4389
AChR clusters/mm	P-value (Two-way ANOVA)	summary
WT - Agrin vs. WT + Agrin	<0.001	***
Y86F - Agrin vs. Y86F + Agrin	0.0021	**
WT + Agrin vs. Y86F + Agrin	<0.001	***
7H
Neddylated δ-AChR	n	mean	SEM			WT	Y86F
WT	3	1	0		trial 1	1	0.37
Y86F	3	0.28	0.04509		trial 2	1	0.23
					trial 3	1	0.24
Neddylated δ-AChR	P-value (Unpaired t- test)	summary
WT vs. Y86F	< 0.001	***
7J
Rapsn p-Tyr	n	mean	SEM			0 min	10 min	20 min	60 min	90 min	120 min
0 min	3	1	0		trial 1	1	4.1	6.1	5.8	5.2	4.3
10 min	3	4.257	0.2797		trial 2	1	3.87	5.8	5.4	4.25	4.55
20 min	3	6.4	0.4583		trial 3	1	4.8	7.3	4.2	4.98	5.8
60 min	3	5.133	0.4807
90 min	3	4.81	0.2871
120 min	3	4.883	0.464
Rapsn p-Tyr	P-value (Unpaired t-test)	summary
0 min vs. 10 min	<0.001	***
0 min vs. 20 min	<0.001	***
0 min vs. 60 min	<0.001	***
0 min vs. 90 min	<0.001	***
0 min vs. 120 min	<0.001	***
Neddylated δ-AChR	n	mean	SEM			0 min	10 min	20 min	60 min	90 min	120 min
0 min	3	1	0		trial 1	1	1.3	1.3	2.4	4.8	6.7
10 min	3	1.03	0.176		trial 2	1	1.1	1.4	3.5	5.1	5.6
20 min	3	1.4	0.057		trial 3	1	0.7	1.5	2.5	6.4	4.7
60 min	3	2.8	0.351
90 min	3	5.43	0.491
120 min	3	5.66	0.578
Neddylated δ-AChR	P-value (Unpaired t-test)	summary
0 min vs. 10 min	0.859	n.s
0 min vs. 20 min	0.002	**
0 min vs. 60 min	0.0068	**
0 min vs. 90 min	<0.001	***
0 min vs. 120 min	<0.001	***
MuSK p-Tyr	n	mean	SEM			0 min	10 min	20 min	60 min	90 min	120 min
0 min	3	1	0		trial 1	1	8.9	9.5	11.2	8.7	8.6
10 min	3	9.6	0.4359		trial 2	1	9.5	7.3	11.3	8.9	9.4
20 min	3	9.47	1.24		trial 3	1	10.4	11.6	8.1	9.3	11.4
60 min	3	10.2	1.05
90 min	3	8.967	0.176
120 min	3	9.8	0.832
MuSK p-Tyr	P-value (Unpaired t-test)	summary
0 min vs. 10 min	<0.001	***
0 min vs. 20 min	<0.001	***
0 min vs. 60 min	<0.001	***
0 min vs. 90 min	<0.001	***
0 min vs. 120 min	<0.001	***
Self-binding	n	mean	SEM			0 min	10 min	20 min	60 min	90 min	120 min
0 min	3	1	0		trial 1	1	1.3	1.7	2.4	2.4	2.7
10 min	3	1.08	0.1331		trial 2	1	1.1	1.4	2.5	2.7	2.4
20 min	3	1.46	0.1201		trial 3	1	0.84	1.3	1.8	2.2	2.6
60 min	3	2.23	0.2185
90 min	3	2.43	0.1453
120 min	3	2.53	0.2728
Self-binding	P-value (Unpaired t-test)	summary
0 min vs. 10 min	0.5803	ns
0 min vs. 20 min	0.01779	*
0 min vs. 60 min	0.04857	**
0 min vs. 90 min	<0.001	***
0 min vs. 120 min	<0.001	***
7L
Self-binding	n	mean	SEM			WT	Y86F
WT	3	1	0		trial 1	1	0.74
Y86F	3	0.4967	0.1244		trial 2	1	0.42
					trial 3	1	0.33
Self-binding	P-value (Unpaired t- test)	summary
WT vs. Y86F	0.0155	*
7N
Self-binding	n	mean	SEM			WT	N88K
WT	3	1	0		trial 1	1	0.55
N88K	3	0.4867	0.0348		trial 2	1	0.43
					trial 3	1	0.48
Self-binding	P-value (Unpaired t- test)	summary
WT vs. N88K	< 0.001	***
