# Supplementary material for: A mechanism in agrin signaling revealed by a prevalent Rapsyn mutation in congenital myasthenic syndrome
Source: eLife. 2019 Sep 24;8:e49180. doi: 10.7554/eLife.49180 (PMC6779466; doi:10.7554/eLife.49180)
Supplement: Figure 8—source data 1. [file elife-49180-fig8-data1.xlsx]

## Sheet: Sheet1
Figure 8-source data 1
Sample size (n), mean, SEM, p value, statistical methods and results are presented for the data in Figure 8B, 8C, 8D
8B
Relative AChR intensity	n	mean	SEM
WT	21	1	0.1015
N88K	21	0.2414	0.03091
N88K + AAV-WT-EGFP	21	0.7122	0.07055
N88K + AAV-Y86F-EGFP	21	0.2326	0.0238
Relative AChR intensity	P-value (One-way ANOVA)	summary
WT vs. N88K	<0.001	***
WT vs. N88K + AAV-WT-EGFP	0.025	*
WT vs. N88K + AAV-Y86F-EGFP	<0.001	***
N88K vs.N88K + AAV-WT-EGFP	<0.001	***
N88K vs.N88K + AAV-Y86F-EGFP	0.8236	ns
8C
AChR cluster size (μm2)	n	mean	SEM
WT	41	84.54	4.704
N88K	41	54.2	5.65
N88K + AAV-WT-EGFP	41	81.26	4.529
N88K + AAV-Y86F-EGFP	41	57.96	5.616
AChR cluster size (μm2)	P-value (One-way ANOVA)	summary
WT vs. N88K	<0.001	***
WT vs. N88K + AAV-WT-EGFP	0.617	ns
WT vs. N88K + AAV-Y86F-EGFP	<0.001	***
N88K vs.N88K + AAV-WT-EGFP	<0.001	***
N88K vs.N88K + AAV-Y86F-EGFP	0.6379	ns
8D
Length of AChR cluster (μm)	n	mean	SEM
WT	41	16.06	0.5176
N88K	41	29.48	2.206
N88K + AAV-WT-EGFP	41	16.74	0.8461
N88K + AAV-Y86F-EGFP	41	28.24	2.114
Length of AChR cluster (μm)	P-value (One-way ANOVA)	summary
WT vs. N88K	<0.001	***
WT vs. N88K + AAV-WT-EGFP	0.4967	ns
WT vs. N88K + AAV-Y86F-EGFP	<0.001	***
N88K vs.N88K + AAV-WT-EGFP	<0.001	***
N88K vs.N88K + AAV-Y86F-EGFP	0.6863	ns
