# Supplementary figures and images for: A mechanism in agrin signaling revealed by a prevalent Rapsyn mutation in congenital myasthenic syndrome
Source: eLife journal article supplement (doi:10.7554/elife.49180), 2019-09-24

Figure 1 -figure supplement 1

A

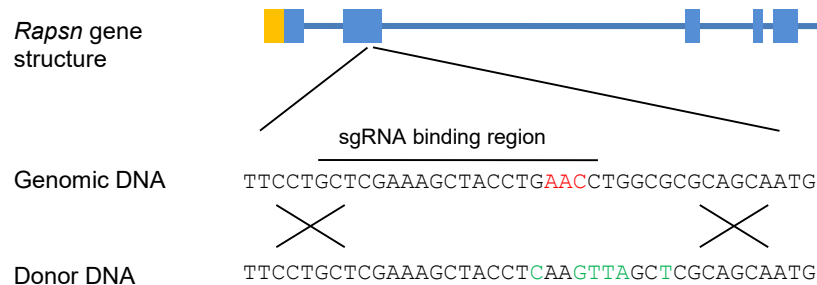

B

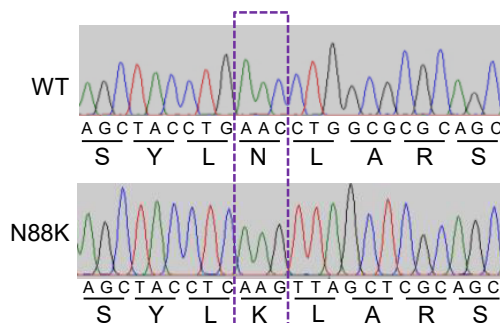

C

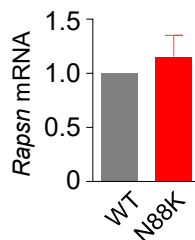

D

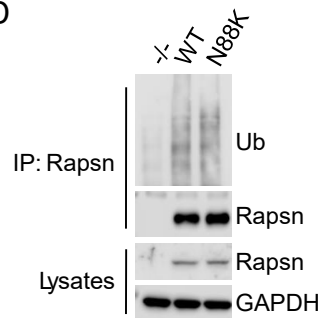

E

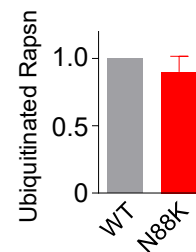

F

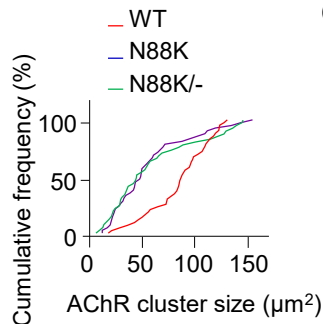

G

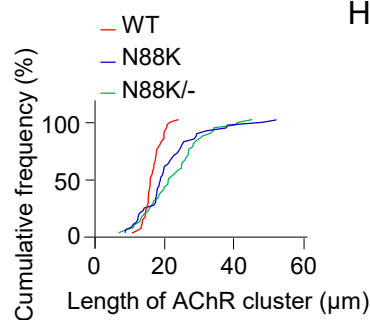

H

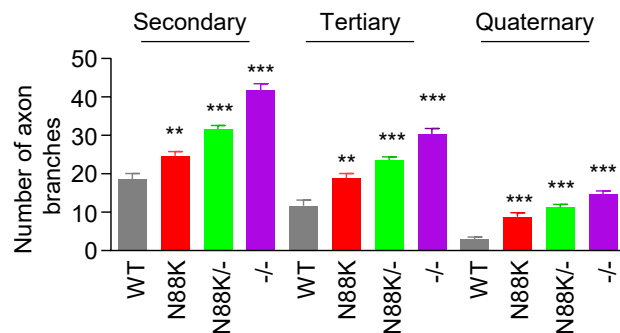

Supplement: supp [file elife_poa_e49180_Figure_1_figure_supplement_1.pdf › elife_poa_e49180_Figure_1_figure_supplement_1.pdf]

Figure 4 -figure supplement 1

A

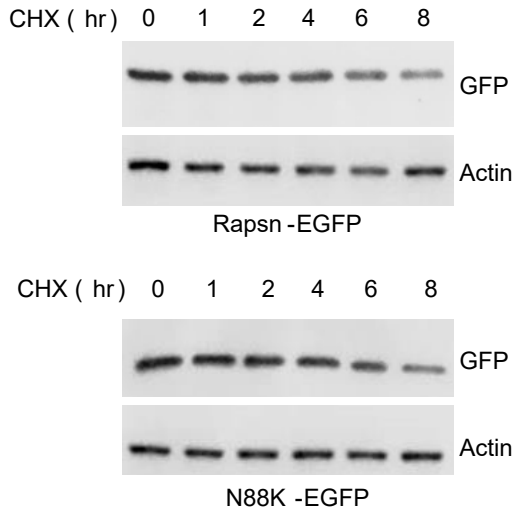

B

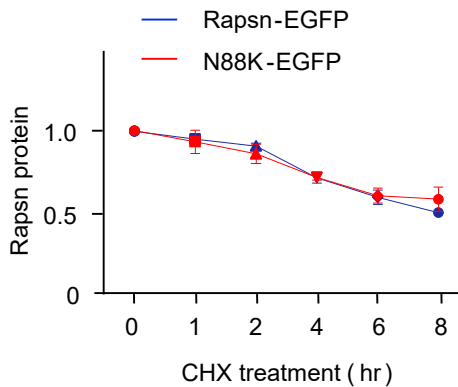

Supplement: supp [file elife_poa_e49180_Figure_4_figure_supplement_1.pdf › elife_poa_e49180_Figure_4_figure_supplement_1.pdf]

Figure 4 -figure supplement 2

A

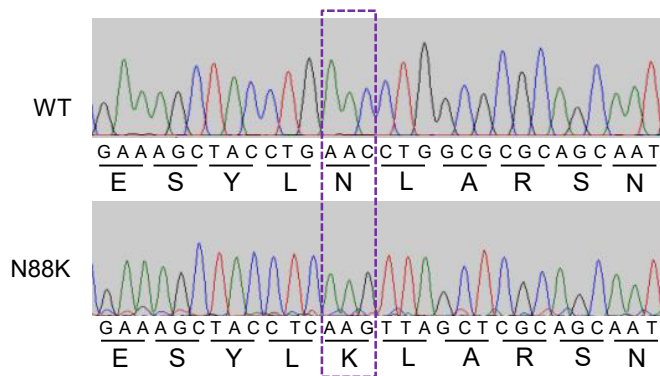

B

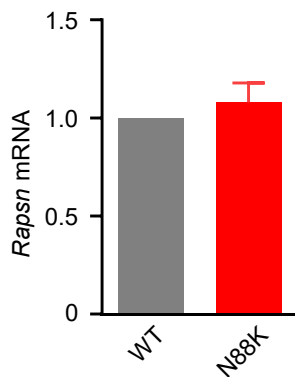

C

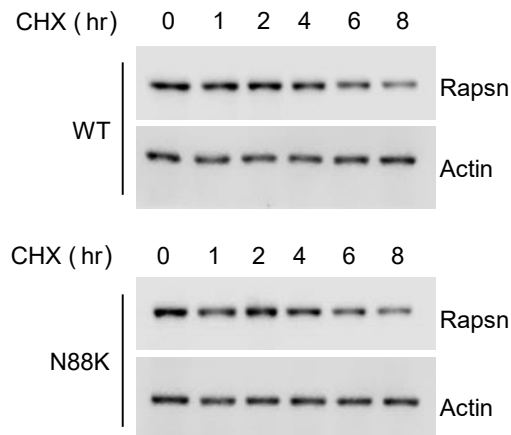

D

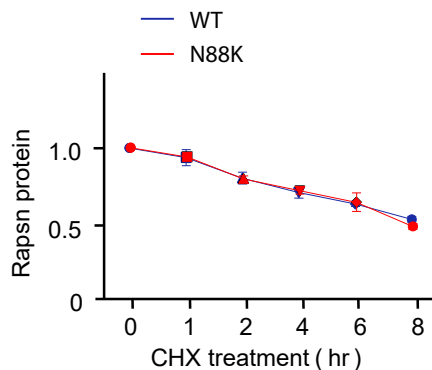

Supplement: supp [file elife_poa_e49180_Figure_4_figure_supplement_2.pdf › elife_poa_e49180_Figure_4_figure_supplement_2.pdf]

Figure 5-figure supplement 1

A

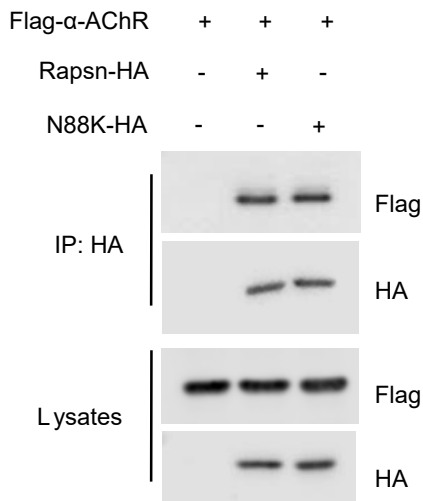

B

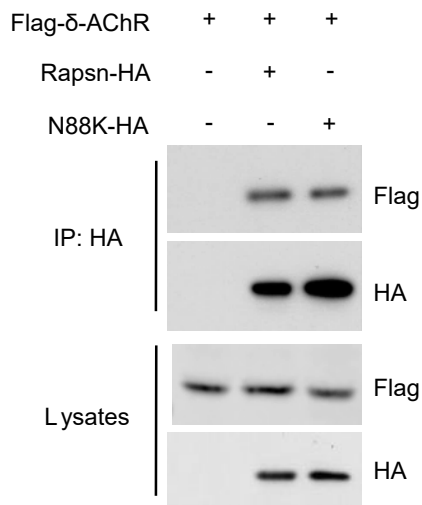

C

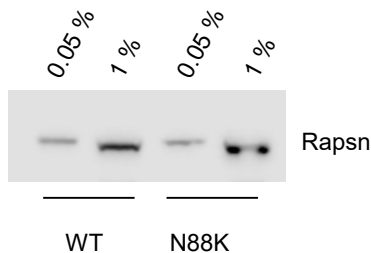

D

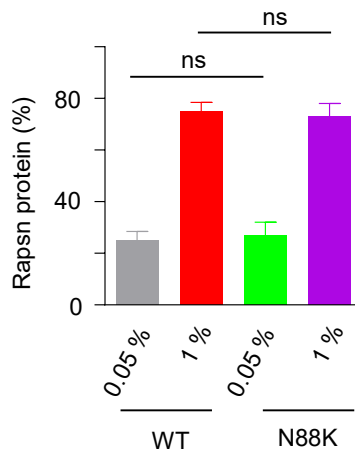

Supplement: supp [file elife_poa_e49180_Figure_5_figure_supplement_1.pdf › elife_poa_e49180_Figure_5_figure_supplement_1.pdf]

Figure 7-figure supplement 1

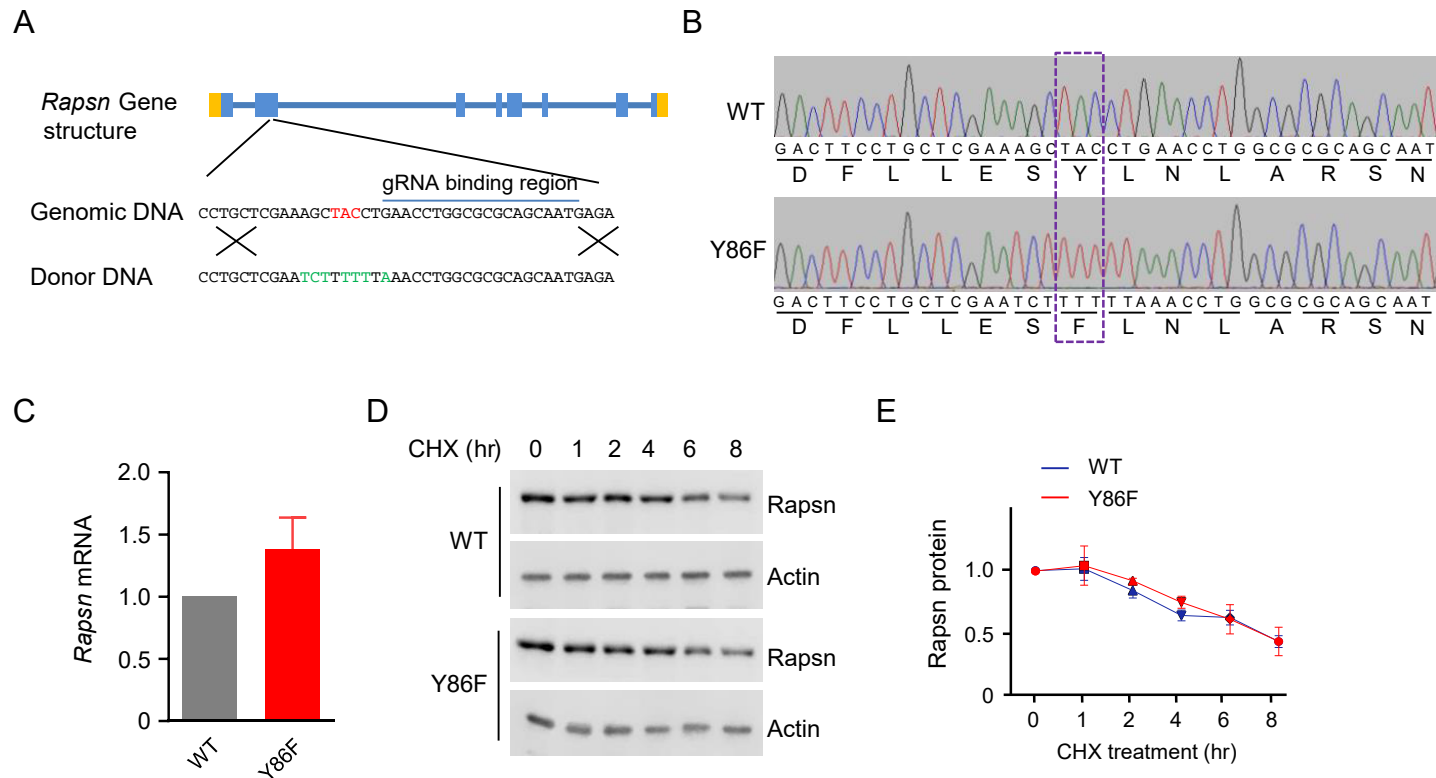

Supplement: supp [file elife_poa_e49180_Figure_7_figure_supplement_1.pdf › elife_poa_e49180_Figure_7_figure_supplement_1.pdf]

Figure 8 -figure supplement 1

A

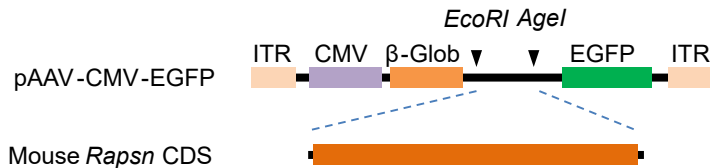

B

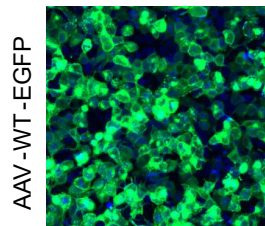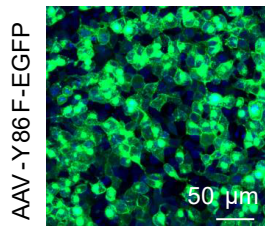

C

N88K +  
AAV-WT-EGFP

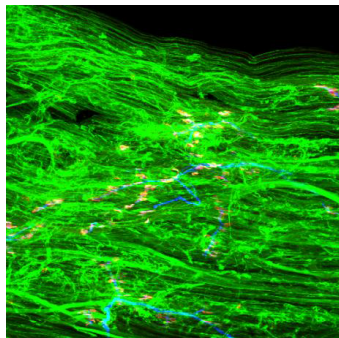

N88K+  
AAV-Y86F-EGFP

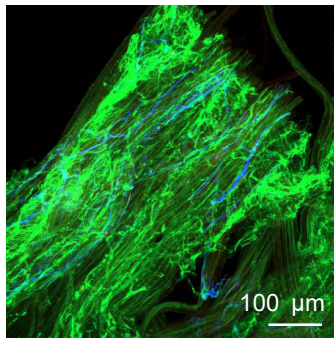

Supplement: supp [file elife_poa_e49180_Figure_8_figure_supplement_1.pdf › elife_poa_e49180_Figure_8_figure_supplement_1.pdf]
